# Supplementary material
Source: PubMed Central journal article supplement (PMC6613981)
Supplement: NIHMS1033473-supplement-S1.pdf [file NIHMS1033473-supplement-S1.pdf]

**Neuron, Volume 100**

**Supplemental Information**

**Circuit Robustness to Temperature Perturbation  
Is Altered by Neuromodulators**

**Sara A. Haddad and Eve Marder**

Figure S1; Relevant to STAR METHODS: Validation of Classification System

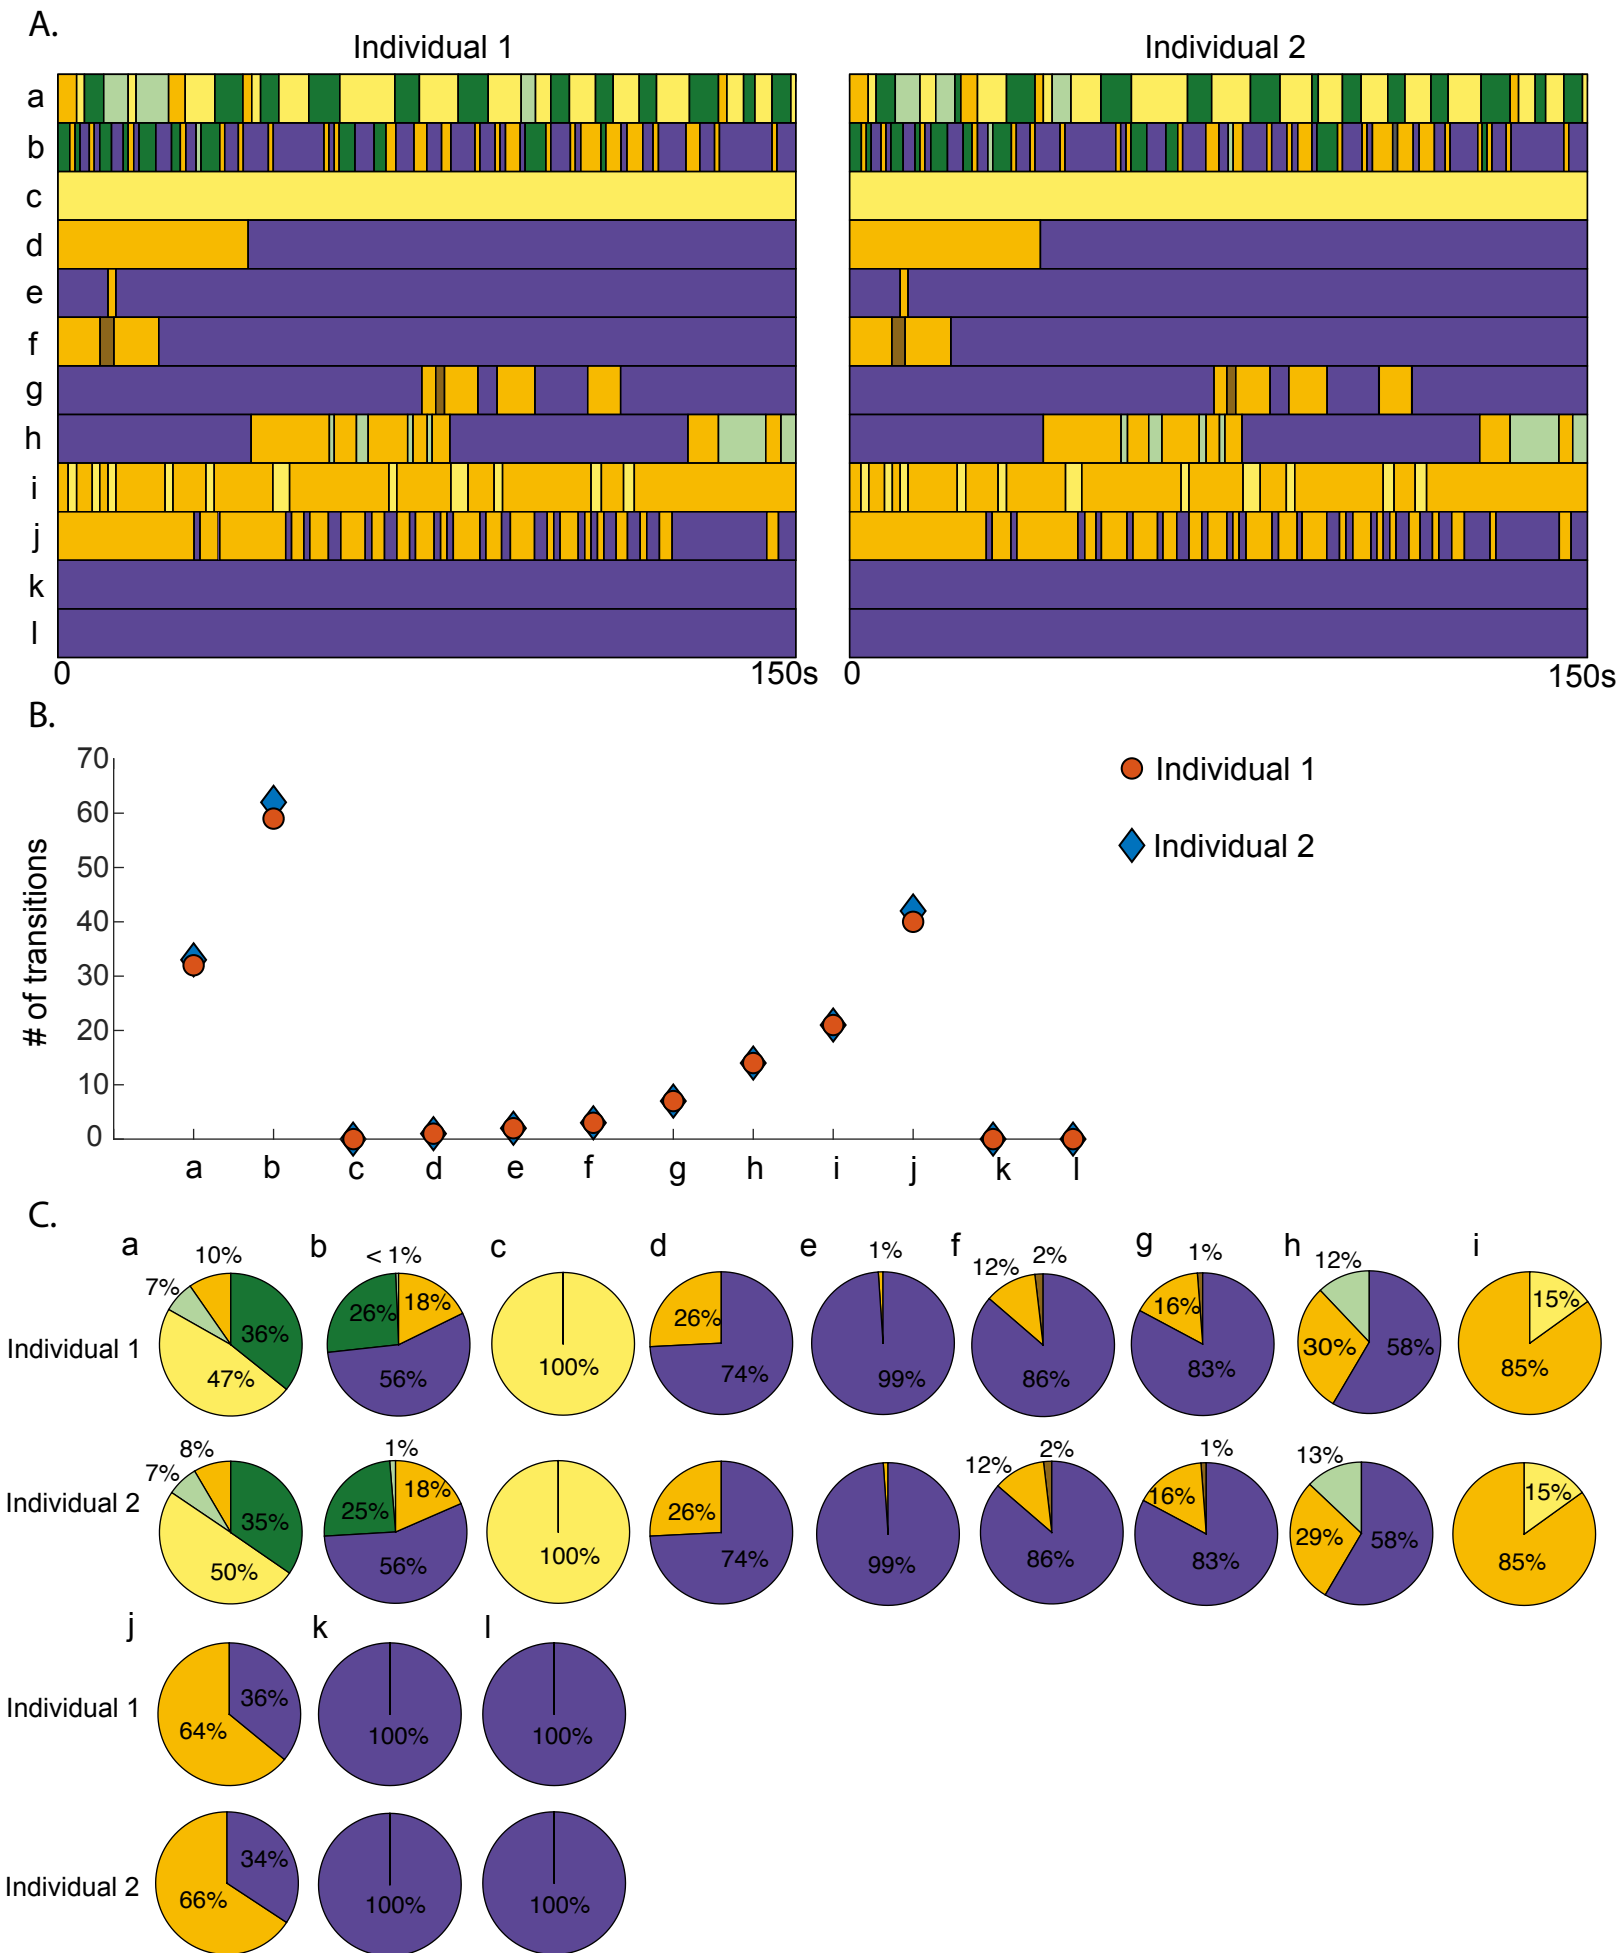

**Figure S1.** Validation of classification method with an independent observer. A. Categorization of states and transitions of 12 sets of recordings collected under various temperature and modulatory conditions (a-l), scored by two observers (Individual 2 blind to the conditions and asked to follow the instructions given in the methods). B. The number of transitions marked in each data set by each individual. C. The amount of time each individual reported a particular category of activity per file.

Table S1; Relevant to STAR METHODS: Validation of Classification System

|                                                             | All Data | a      | b      | j      |
|-------------------------------------------------------------|----------|--------|--------|--------|
| Cohen's Kappa                                               | 0.9611   | 0.8719 | 0.9304 | 0.8438 |
| kappa error                                                 | 0.0057   | 0.0326 | 0.024  | 0.0383 |
| Maximum possible kappa, given observed marginal frequencies | 0.9905   | 0.9451 | 0.9478 | 0.9479 |

**Table S1.** The results of using Cohen's Kappa analysis to assess the degree of true concordance between the two individuals scoring the data (see methods for further description). The analysis shows that the observed agreement between the two individuals is not random and near perfect ( $>0.81$ ), which is true when calculated using all the data scored (All data) and individual files with the most differences (a, b, j).
